# 1 **A sex-specific evolutionary interaction between *ADCY9* and *CETP***

2

3 Isabel Gamache<sup>1,2</sup>, Marc-André Legault<sup>1,2,3</sup>, Jean-Christophe Grenier<sup>1</sup>, Rocio Sanchez<sup>1</sup>, Eric  
4 Rhéaume<sup>1,2</sup>, Samira Asgari<sup>4,5</sup>, Amina Barhdadi<sup>1,3</sup>, Yassamin Feroz Zada<sup>3</sup>, Holly Trochet<sup>1,2</sup>, Yang  
5 Luo<sup>4,5</sup>, Leonid Lecca<sup>6,7</sup>, Megan Murray<sup>4</sup>, Soumya Raychaudhuri<sup>4,5,8,9,10</sup>, Jean-Claude Tardif<sup>1,2</sup>,  
6 Marie-Pierre Dubé<sup>1,2,3</sup>, Julie G. Hussin<sup>1,2\*</sup>

7

## 8 **Affiliations:**

9 <sup>1</sup> Montreal Heart Institute, Montreal, Québec, Canada

10 <sup>2</sup> Faculty of Medicine, Université de Montréal, Montreal, Quebec, Canada

11 <sup>3</sup> Université de Montréal Beaulieu-Saucier Pharmacogenomics Centre, Montreal, Canada

12 <sup>4</sup> Center for Data Sciences, Brigham and Women's Hospital and Harvard Medical School, Boston, MA 02115, USA

13 <sup>5</sup> Program in Medical and Population Genetics, Broad Institute of MIT and Harvard, Cambridge, MA 02115, USA

14 <sup>6</sup> Socios En Salud, Lima, Peru

15 <sup>7</sup> Department of Global Health and Social Medicine, Harvard Medical School

16 <sup>8</sup> Centre for Genetics and Genomics Versus Arthritis, Manchester Academic Health Science Centre, University of  
17 Manchester, Manchester M13 9PL, UK

18 <sup>9</sup> Department of Biomedical Informatics, Harvard Medical School, Boston, MA 02115, USA

19 <sup>10</sup> Department of Medicine, Brigham and Women's Hospital and Harvard Medical School, Boston, MA 02115, USA

20

21 \* E-mail : [julie.hussin@umontreal.ca](mailto:julie.hussin@umontreal.ca)

22 **Abstract**

23

24 Pharmacogenomic studies have revealed associations between rs1967309 in the adenylyl cyclase  
25 type 9 (*ADCY9*) gene and clinical responses to the cholesteryl ester transfer protein (CETP)  
26 modulator dalcetrapib, however, the mechanism behind this interaction is still unknown. Here, we  
27 characterized selective signals at the locus associated with the pharmacogenomic response in  
28 human populations and we show that rs1967309 region exhibits signatures of natural selection in  
29 several human populations. Furthermore, we identified a variant in *CETP*, rs158477, which is in  
30 long-range linkage disequilibrium with rs1967309 in the Peruvian population. The signal is mainly  
31 seen in males, a sex-specific result that is replicated in the LIMAA cohort of over 3,400 Peruvians.  
32 We further detected interaction effects of these two SNPs with sex on cardiovascular phenotypes  
33 in the UK Biobank, in line with the sex-specific genotype associations found in Peruvians at these  
34 loci. Analyses of RNA-seq data further suggest an epistatic interaction on *CETP* expression levels  
35 between the two SNPs in multiple tissues. We propose that *ADCY9* and *CETP* coevolved during  
36 recent human evolution, which points towards a biological link between dalcetrapib's  
37 pharmacogene *ADCY9* and its therapeutic target *CETP*.

38

## 39 **Introduction**

40  
41 Coronary artery disease (CAD) is the leading cause of mortality worldwide. It is a complex disease  
42 caused by the accumulation of cholesterol-loaded plaques that block blood flow in the coronary  
43 arteries. The cholesteryl ester transfer protein (CETP) mediates the exchange of cholesterol esters  
44 and triglycerides between high-density lipoproteins (HDL) and lower density lipoproteins (1,2).  
45 Dalcetrapib is a CETP modulator that did not reduce cardiovascular event rates in the overall dal-  
46 OUTCOMES trial of patients with recent acute coronary syndrome (3). However,  
47 pharmacogenomic analyses revealed that genotypes at rs1967309 in the *ADCY9* gene, coding for  
48 the ninth isoform of adenylate cyclase, modulated clinical responses to dalcetrapib (4). Individuals  
49 who carried the AA genotype at rs1967309 in *ADCY9* had less cardiovascular events, reduced  
50 atherosclerosis progression, and enhanced cholesterol efflux from macrophages when treated with  
51 dalcetrapib compared to placebo (4,5). In contrast, those with the GG genotype had the opposite  
52 effects from dalcetrapib. Furthermore, a protective effect against the formation of atherosclerotic  
53 lesions was seen only in the absence of both *Adcy9* and *CETP* in mice (6), suggesting an interaction  
54 between the two genes. However, the underlying mechanisms linking *CETP* and *ADCY9*, located  
55 50 Mb apart on chromosome 16, as well as the relevance of the rs1967309 non-coding genetic  
56 variant are still unclear.

57  
58 Identification of selection pressure on a genetic variant can help shed light on its importance.  
59 Adaptation to different environments often leads to a rise in frequency of variants, by favoring  
60 survival and/or reproduction fitness. An example is the lactase gene (*LCT*) (7–11), where a  
61 positively selected intronic variant in *MCM6* leads to an escape from epigenetic inactivation of

62 *LCT* and facilitates lactase persistence after weaning (12). Results of genomic studies for  
63 phenotypes such as adaptation to high-altitude hypoxia in Tibetans (13), fatty acid metabolism in  
64 Inuits (14) or response to pathogens across populations (15) have also been confirmed by  
65 functional studies (16–20). Thus, population and regulatory genomics can be leveraged to unveil  
66 the effect of genetic mutations at a single non-coding locus and reveal the biological mechanisms  
67 of adaptation.

68  
69 When two or more loci interact during adaptation, a genomic scan will likely be underpowered to  
70 pinpoint the genetic determinants. In this study, we took an evolutionary approach on the *ADCY9*  
71 and *CETP* candidate genes to specifically study their interaction. As a first step, we used a joint  
72 evolutionary analysis to evaluate the potential signatures of selection in these genes, which  
73 revealed positive selection pressures acting on *ADCY9*. Genetic associations between the two  
74 genes are discovered in Peruvians, a population in which natural selection for high-altitude was  
75 previously found on genes related to cardiovascular health (21). In a second step, our analyses of  
76 large-scale transcriptomics and available phenome-wide resources bring further evidence of an  
77 epistatic interaction between *ADCY9* and *CETP*.

78

## 79 **Results**

80

### 81 **Signatures of selection at rs1967309 in *ADCY9* in human populations**

82 The genetic variant rs1967309 is located in intron 2 of *ADCY9*, in a region of high linkage  
83 disequilibrium (LD), and harbors heterogeneous genotype frequencies across human populations  
84 from the 1000 Genomes Project (Fig. 1a). Its intronic location makes it difficult to assess its

85 functional relevance but exploring selective signals around intronic SNPs in human populations  
86 can shed light on their importance. In African populations (AFR), the major genotype is AA, which  
87 is the homozygous genotype for the ancestral allele, whereas in Europeans (EUR), AA is the minor  
88 genotype. The frequency of the AA genotype is slightly higher in Asia (EAS, SAS) and America  
89 (AMR) compared to that in Europe, becoming the most frequent genotype in the Peruvian  
90 population (PEL). Using the integrated haplotype score (iHS) (22), a statistic that enables the  
91 detection of evidence for recent strong positive selection (typically when  $|iHS| > 2$ ), we observed  
92 that several SNPs in the LD block around rs1967309 exhibit selective signatures in non-African  
93 populations ( $|iHS_{SAS}| = 2.66$ ,  $|iHS_{EUR}| = 2.31$ ), whereas no signal is seen in this LD block in African  
94 populations (Fig. 1b, Supplementary Fig. 1, Supplementary text). Our analyses suggest that this  
95 locus in *ADCY9* has been the target of recent positive selection in several human populations, with  
96 multiple, possibly independent, selective signals detectable around rs1967309. However, recent  
97 positive selection as measured by iHS does not seem to explain the notable increase in frequency  
98 for the A allele in the PEL population ( $f_A = 0.77$ ), compared to the European ( $f_A = 0.41$ ), Asian  
99 ( $f_A = 0.44$ ), and other American populations ( $f_A = 0.54$  in AMR without PEL).

100 To test whether the difference between PEL and other AMR allele frequencies at rs1967309 is  
101 significant, we used the population branch statistic (PBS) (Methods). This statistic has been  
102 developed to locate selection signals by summarizing differentiation between populations using a  
103 three-way comparison of allele frequencies between a specific group, a closely related population,  
104 and an outgroup (13). It has been shown to increase power to detect incomplete selective sweeps  
105 on standing variation. Applying this statistic to investigate rs1967309 allele frequency in PEL, we  
106 used Mexicans (MXL) as a closely related group and a Chinese population (CHB) as the outgroup  
107 (Methods). Over the entire genome, the CHB branches are greater than PEL and MXL branches

108 (mean<sub>CHB</sub>=0.020, mean<sub>MXL</sub>=0.008, mean<sub>PEL</sub>=0.009), which reflects the expectation under genetic  
109 drift. However, the estimated PEL branch length at rs1967309 (Fig. 1c), which reflects  
110 differentiation since the split from the MXL population (PBS<sub>PEL,rs1967309</sub>=0.051, empirical p-value  
111 = 0.014), surpasses the CHB branch length (PBS<sub>CHB,rs1967309</sub>=0.049, empirical p-value > 0.05),  
112 which reflects differentiation since the split between Asian and American populations, whereas no  
113 such effect is seen in MXL (PBS<sub>MXL,rs1967309</sub>=0.026, empirical p-value > 0.05), or for any other  
114 AMR populations. Furthermore, the PEL branch lengths at several SNPs in this LD block (Fig.  
115 1c) are in the top 5% of all PEL branch lengths across the whole genome (PBS<sub>PEL,95th</sub> = 0.031),  
116 whereas these increased branch lengths are not observed outside of the LD block (Fig. 1c). These  
117 results are robust to the choice of the outgroup and the closely related AMR population (Methods).  
118 The increase in frequency of the A allele at rs1967309 is also seen in genotype data from Native  
119 American populations (23), with Andeans showing genotype frequencies highly similar to PEL  
120 (f<sub>A</sub>=0.77, Fig. 1a). The PEL population has a large Andean ancestry (Supplementary Fig. 2,  
121 Methods) and almost no African ancestry, strongly suggesting that the increase in AA genotype  
122 arose in the Andean population and not from admixture with Africans. The PEL individuals that  
123 harbor the AA genotype for rs1967309 do not exhibit a larger genome-wide Andean ancestry than  
124 non-AA individuals (p-value=0.30, Mann-Whitney U test). Overall, these results suggest that the  
125 ancestral allele A at rs1967309, after dropping in frequency following the out-of-Africa event, has  
126 increased in frequency in the Andean population and has been preferentially retained in the  
127 Peruvian population's genetic makeup, potentially because of natural selection.

128

## 129 **Evidence for co-evolution between *ADCY9* and *CETP* in Peru**

130 The pharmacogenetic link between *ADCY9* and the *CETP* modulator dalcetrapib raises the  
131 question of whether there is a genetic relationship between rs1967309 in *ADCY9* and *CETP*, both  
132 located on chromosome 16. Such a relationship can be revealed by analyzing patterns of long-  
133 range linkage disequilibrium (LRLD) (24,25), in order to detect whether specific combinations of  
134 alleles (or genotypes) at two loci are particularly overrepresented. To do so, we calculated the  
135 genotyped-based linkage disequilibrium ( $r^2$ ) between rs1967309 and each SNP in *CETP* with  
136 minor allele frequency (MAF) above 0.05. In the Peruvian population, there are four SNPs,  
137 (including 2 in perfect LD in PEL) that exhibit  $r^2$  values with rs1967309 that are in the top 1% of  
138  $r^2$  values (Fig. 2a) computed for all 37,802 pairs of SNPs in *ADCY9* and *CETP* genes with  
139 MAF>0.05 (Methods). Despite the  $r^2$  values themselves being low ( $r^2_{rs158477}=0.080$ ,  
140  $r^2_{rs158480;rs158617}=0.089$ ,  $r^2_{rs12447620}=0.090$ ), these values are highly unexpected for these two genes  
141 situated 50 Mb apart ( $p<0.005$ ) and thus correspond to a significant LRLD signal. We also  
142 computed  $r^2$  between the four identified SNPs' genotypes and all *ADCY9* SNPs with MAF above  
143 0.05 (Fig. 2b). The distribution of  $r^2$  values for the rs158477 *CETP* SNP shows a clear bell-shaped  
144 pattern around rs1967309 in *ADCY9*, which strongly suggests the rs1967309-rs158477 genetic  
145 association detected is not simply a statistical fluke, while the signal in the region for the other  
146 SNPs is less conclusive. The SNP rs158477 in *CETP* is also the only one that has a PEL branch  
147 length value higher than the 95<sup>th</sup> percentile, also higher than the CHB branch length value  
148 ( $PBS_{PEL,rs158477}= 0.062$ , Supplementary Fig. 3a), in line with the observation at rs1967309.  
149 Strikingly, this *CETP* SNP's genotype frequency distribution across the 1000G and Native  
150 American populations resembles that of rs1967309 in *ADCY9* (Fig. 2c).

151 Given that the Peruvian population is admixed (26), particular enrichment of genome segments for  
152 a specific ancestry, if present, would lead to inflated LRLD between these segments (27–30).  
153 However, no significant enrichment is seen at either locus and significant LRLD is also seen in  
154 the Andean source population (Supplementary text, Supplementary Fig. 4a,b). Furthermore, we  
155 see no enrichment of Andean ancestry in individuals harboring the overrepresented combination  
156 of genotypes, AA at rs1967309 + GG at rs158477, compared to other combinations (p-value=0.18,  
157 Mann-Whitney U test). These results show that admixture patterns in PEL cannot be solely  
158 responsible for the association found between rs1967309 and rs158477. Finally, using a genome-  
159 wide null distribution which allows to capture the LRLD distribution expected under the admixture  
160 levels present in this sample (Supplementary text), we show that the  $r^2$  value between the two SNPs  
161 is higher than expected given their allele frequencies and the physical distance between them  
162 (genome-wide empirical p-value=0.01, Fig. 2d). Taken together, these findings strongly suggest  
163 that the AA/GG combination is being transmitted to the next generation more often (ie. is likely  
164 selectively favored) which reveals a signature of co-evolution between *ADCY9* and *CETP* at these  
165 loci.

166 Still, such a LRLD signal can be due to a small sample size (29). To confirm independently the  
167 association between genotypes at rs1967309 of *ADCY9* and rs158477 of *CETP*, we used the  
168 LIMAA cohort (31,32), a large cohort of 3,509 Peruvian individuals with genotype information,  
169 to replicate our finding. The ancestry distribution, as measured by RFMix (Methods) is similar  
170 between the two cohorts (Supplementary Fig. 2), however, the LIMAA cohort population structure  
171 shows additional subgroups compared to the 1000G PEL population sample (Supplementary Fig.  
172 5). In this cohort, the pair of SNPs rs1967309-rs158477 is the only pairs identified in PEL who  
173 shows evidence for LRLD, with an  $r^2$  value in the top 1% of all pairs of SNPs in *ADCY9* and *CETP*



174 (Supplementary Fig. 6a,b, 7) (*ADCY9/CETP* empirical p-value=0.003). The  $r^2$  test used above is  
175 powerful to detect allelic associations, but the net association measured will be very small if  
176 selection acts on a specific genotype combination rather than on alleles. In that scenario, and when  
177 power allows it, the genotypic association is better assessed by with a  $\chi^2$  distributed test statistic  
178 (with four degrees of freedom,  $\chi_4^2$ ) comparing the observed and expected genotype combination  
179 counts (25). The test confirmed the association in LIMAA ( $\chi_4^2=82.0$ , permutation p-value <0.001,  
180 genome-wide empirical p-value=0.0003, Supplementary text). The association discovered  
181 between rs1967309 and rs158477 is thus generalizable to the Peruvian population and not limited  
182 to the 1000G PEL sample.

183

#### 184 **Sex-specific long-range linkage disequilibrium signal**

185 We explored the effect of sex on the LRLD association found between rs1967309 and rs158477.  
186 The allele frequencies at rs1967309 were suggestively different between males and females and  
187 sex-stratified PBS analyses suggest that the LD block around rs1967309 is differentiated between  
188 sexes in the Peruvians (Supplementary Fig. 3a), although we could not exclude the possibility of  
189 random sampling noise (Supplementary text). We further performed sex-stratified LRLD analyses,  
190 which revealed that the correlation between rs1967309 and rs158477 is only seen in males (Fig.  
191 3a,b, Supplementary text, Supplementary Fig. 8a,b): the  $r^2$  value rose to 0.348 in males  
192 (*ADCY9/CETP* empirical p-value= $8.23 \times 10^{-5}$ , genome-wide empirical p-value <  $2.85 \times 10^{-4}$ , N=41)  
193 and became non-significant in females (*ADCY9/CETP* empirical p-value=0.78, genome-wide  
194 empirical p-value=0.80, N=44). This result cannot be explained by differences of Andean ancestry  
195 proportion between males and females (p-value=0.27, Mann-Whitney U test). A permutation  
196 analysis that shuffled the sex labels of samples established that the observed difference between

197 the sexes is larger than what we expect by chance (p-value=0.002, Supplementary Fig. 8c,  
198 Supplementary text). In the LIMAA cohort, we replicate this sex-specific result (Fig. 3c,d) where  
199 the  $r^2$  test is significant in males (*ADCY9/CETP* empirical p-value=0.003, N=2,078) but not in  
200 females (*ADCY9/CETP* empirical p-value=0.66, N=1,434). The genotypic  $\chi_4^2$  test confirms the  
201 association between *ADCY9* and *CETP* is present in males ( $\chi_4^2 = 56.6$ , permutation p-value=0.001,  
202 genome-wide empirical p-value=0.002, Supplementary text), revealing an excess of rs1967309-  
203 AA + rs158477-GG. This is also the genotype combination driving the LRLD in PEL. In females,  
204 the test also shows a weaker but significant effect ( $\chi_4^2 = 37.0$ , permutation p-value = 0.017,  
205 genome-wide empirical p-value = 0.001) driven by an excess of a different genotype combination,  
206 rs1967309-AA + rs158477-AA, which is however not replicated in PEL possibly because of lack  
207 of power (Supplementary text).

208

### 209 **Epistatic effects on *CETP* gene expression**

210 LRLD between variants can suggest the existence of gene-gene interactions, especially if they are  
211 functional variants (29). In order to be under selection, mutations typically need to modulate a  
212 phenotype or an endophenotype, such as gene expression. We have shown previously (6) that  
213 *CETP* and *ADCY9* interact in mice to modulate several phenotypes, including atherosclerotic  
214 lesion development. To test whether these genes interact in humans, we knocked down (KD)  
215 *ADCY9* in hepatocyte HepG2 cells (Methods) and performed RNA sequencing on five KD  
216 biological replicates and five control replicates, to evaluate the impact of decreased *ADCY9*  
217 expression on the transcriptome. We confirmed the KD was successful as *ADCY9* expression is  
218 reduced in the KD replicates (Fig. 4a), which represents a drastic drop in expression compared to  
219 the whole transcriptome changes (False Discovery Rate [FDR] =  $4.07 \times 10^{-14}$ , Methods). We also

220 observed that *CETP* expression was increased in *ADCY9-KD* samples compared to controls (Fig.  
221 4a), an increase that is also transcriptome-wide significant ( $FDR=1.97 \times 10^{-7}$ ,  $\beta = 1.257$ ). This  
222 increased expression was validated by qPCR, and western blot also showed increased *CETP*  
223 protein product (Supplementary text, Supplementary Fig. 9, Supplementary Table 2). Conversely,  
224 knocking down or overexpressing *CETP* did not impact *ADCY9* expression on qPCR (data not  
225 shown). These experiments demonstrate an interaction between *ADCY9* and *CETP* at the gene  
226 expression level and raised the hypothesis that *ADCY9* potentially modulates the expression of  
227 *CETP* through a genetic effect mediated by rs1967309.

228 To test for potential interaction effects between rs1967309 and *CETP*, we used RNA-seq data from  
229 diverse projects in humans: the GEUVADIS project (33), the Genotype-Tissue Expression (GTEx  
230 v8) project (34) and CARTaGENE (CaG) (35). We evaluated the effects of the SNPs on expression  
231 levels of *ADCY9* and *CETP* by modelling both SNPs as continuous variables (additive model)  
232 (Methods). The *CETP* SNP rs158477 was reported as an expression quantitative trait locus (eQTL)  
233 in GTEx v7 and, in our models, shows evidence of being a *cis* eQTL of *CETP* in several other  
234 tissues (Supplementary text), although not reaching genome-wide significance. To test specifically  
235 for an epistatic effect between rs1967309 and rs158477 on *CETP* expression, we included an  
236 interaction term in eQTL models (Methods). We note here that we are testing for association for  
237 this specific pair of SNPs only, and that effects across tissues are not independent, such that we set  
238 our significance threshold at  $p\text{-value}=0.05$ . This analysis revealed a significant interaction effect  
239 ( $p\text{-value}=0.03$ ,  $\beta = -0.22$ ) between the two SNPs on *CETP* expression in GEUVADIS  
240 lymphoblastoid cell lines (Fig. 4b, Supplementary Fig. 10a). In rs1967309 AA individuals, copies  
241 of the rs158477 A allele increased *CETP* expression by 0.46 (95% CI 0.26-0.86) on average. In  
242 rs1967309 AG individuals, copies of the rs158477 A allele increased *CETP* expression by 0.24

243 (95% CI 0.06-0.43) on average and the effect was null in rs1967309 GG individuals (p-  
244 value<sub>GG</sub>=0.58). This suggests that the effect of rs158477 on *CETP* expression changes depending  
245 on genotypes of rs1967309. The interaction is also significant in several GTEx tissues, most of  
246 which are brain tissues, like hippocampus, hypothalamus and substantia nigra, but also in skin,  
247 although we note that the significance of the interaction depends on the number of PEER factors  
248 included in the model (Supplementary Fig. 11). These factors are needed to correct for unknown  
249 biases in the data, but also potentially lead to decreased power to detect interaction effects (36). In  
250 CaG whole blood samples, the interaction effect using additive genetic effect at rs1967309 was  
251 not significant, similarly to results from GTEx in whole blood samples. However, given the larger  
252 size of the dataset, we evaluated a genotypic encoding for the rs1967309 SNP in which the  
253 interaction effect is significant (p-value=0.008, Supplementary Fig. 10b) in whole blood,  
254 suggesting that rs1967309 could be modulating rs158477 eQTL effect, in this tissue at least, with  
255 a genotype-specific effect. We highlight that the sample sizes of current transcriptomic resources  
256 do not allow to detect interaction effects at genome-wide significance, however the likelihood of  
257 finding interaction effects between our two SNPs on *CETP* expression in three independent  
258 datasets is unlikely to happen by chance alone, providing evidence for a functional genetic  
259 interaction.

260

### 261 **Epistatic effects on phenotypes**

262 The interaction effect of rs1967309 and rs158477 on *CETP* expression in several tissues, found in  
263 multiple independent RNA-seq datasets, coupled with the detection of LRLD between these SNPs  
264 in the Peruvian population suggest that selection may act jointly on these loci, specifically in  
265 Peruvians or Andeans. These populations are well known for their adaptation to life in high

266 altitude, where the oxygen pressure is lower and where the human body is subjected to hypoxia  
267 (37–40). High altitude hypoxia impacts individuals' health in many ways, such as increased  
268 ventilation, decreased arterial pressure, and alterations of the energy metabolism in cardiac and  
269 skeletal muscle (41,42). To test which phenotype(s) may explain the putative coevolution signal  
270 discovered, we investigated the impact of the interaction between rs1967309 and rs158477 on  
271 several physiological traits, energy metabolism and cardiovascular outcomes using the UK  
272 Biobank and GTEx cohort (Supplementary Table 1). The UK Biobank has electronic medical  
273 records and GTEx has cause of death and variables from medical questionnaires (34). The  
274 interaction term was found to be nominally significant ( $p$ -value $<0.05$ ) for forced vital capacity  
275 (FVC), forced expiratory volume in 1-second (FEV1) and whole-body water mass, and suggestive  
276 ( $p$ -value $<0.10$ ) for the basal metabolic rate, all driven by the effects in females (Supplementary  
277 Fig. 12a). For CAD, the interaction is suggestive ( $p$ -value $<0.10$ ) and, in this case, driven by males  
278 (Supplementary Fig. 12a).

279 Given this sex-specific result on CAD, the condition targeted by dalcetrapib, we tested the effect  
280 of an interaction between sex, rs158477 and rs1967309 (genotypic encoding, see **Methods**) on  
281 binary cardiovascular outcomes including myocardial infarction (MI) and CAD. For CAD, we see  
282 a significant three-way interaction effect, meaning that for individuals carrying the AA genotype  
283 at rs1967309, the association between rs158477 and CAD is in the opposite direction in males and  
284 females. In other words, in rs1967309-AA females, having an extra A allele at rs158477, which is  
285 associated with higher CETP expression (**Fig. 4b**), has a protective effect on CAD. Conversely, in  
286 rs1967309-AA males, each A allele at rs158477 increases the probability of having an event (**Fig.**  
287 **5a**). Little effect is seen in either sex for AG or GG at rs1967309, although the heterozygotes AG  
288 behave differently in females (which further justifies the genotypic encoding of rs1967309). The

289 beneficial effect of the interaction on CAD thus favors the rs1967309-AA + rs153477-GG males  
290 and the rs1967309-AA + rs153477-AA females, two genotype combinations which are  
291 respectively enriched in a sex-specific manner in the LIMAA cohort (Supplementary text). Again,  
292 observing such a result that concords with the direction of effects in the LRLD sex-specific finding  
293 is noteworthy. A significant interaction between the SNPs is also seen in the GTEx cohort (p-  
294 value=0.004, Supplementary Fig. 12b,c, Supplementary text), using questionnaire phenotypes  
295 reporting on MI, but the small number of individuals precludes formally investigating sex effects.  
296 Among the biomarkers studied (Supplementary Table 1), only lipoprotein(a) [Lp(a)] is suggestive  
297 in males (p-value=0.08) for an interaction between rs1967309 and rs158477, with the same  
298 direction of effect as that for CAD (Fig. 5a,b). Again, given the differences observed between the  
299 sexes, we tested the effect of an interaction between sex, rs158477 and rs1967309 (genotypic  
300 coding, Methods) on biomarkers, and only Lp(a) was nominally significant in a three-way  
301 interaction (p-value=0.049). The pattern is similar to the results for CAD, ie. a change in the effect  
302 of rs158477 depending on the genotype of rs1967309 in males, with the effect for AA females in  
303 the opposite direction compared to males (Fig. 5b). These concordant results between CAD and  
304 Lp(a) support that the putative interaction effect between the loci under study on phenotypes  
305 involves sex as a modifier.

306

## 307 Discussion

308

309 In this study, we used population genetics, transcriptomics and interaction analyses in biobanks to  
310 study the link between *ADCY9* and *CETP*. Our study revealed selective signatures in *ADCY9* and  
311 a significant genotypic association between *ADCY9* and *CETP* in two Peruvian cohorts,

312 specifically between rs1967309 and rs158477, which was also seen in the Native population of the  
313 Andes. The interaction between the two SNPs was found to be nominally significant for respiratory  
314 and cardiovascular disease outcomes (Fig. 5, Supplementary Fig. 12). Additionally, a nominally  
315 significant epistatic interaction was seen on *CETP* expression in many tissues, including the  
316 hippocampus and hypothalamus in the brain. Despite brain tissues not displaying the highest *CETP*  
317 expression levels, *CETP* that is synthesized and secreted in the brain could play an important role  
318 in the transport and the redistribution of lipids within the central nervous system (43,44) and has  
319 been associated with Alzheimer's disease risk (45,46). These findings reinforce the fact that the  
320 SNPs are likely functionally interacting, but extrapolating on the specific phenotypes under  
321 selection from these results is not straight forward. Identifying the phenotype and environmental  
322 pressures that may have caused the selection signal is complicated by the fact that the UK Biobank  
323 participants, on which the marginally significant associations have been found, do not live in the  
324 same environment as Peruvians. In Andeans from Peru, selection in response to hypoxia at high  
325 altitude was proposed to have effects on the cardiovascular system (21). The hippocampus  
326 functions are perturbed at high altitude (eg. deterioration of memory (47,48)), whereas the  
327 hypothalamus regulates the autonomic nervous system and controls the heart and respiratory rates  
328 (49,50), phenotypes which are affected by hypoxia at high altitude (51,52). Furthermore, high  
329 altitude-induced hypoxia (53,54) and cardiovascular system disturbances (55,56) have been shown  
330 to be associated in several studies (57–61), thus potentially sharing common biological pathways.  
331 Therefore, our working hypothesis is that selective pressures on our genes of interest in Peru are  
332 linked to the physiological response to high-altitude, which might be the environmental driver of  
333 coevolution.

334 The interaction effect between the *ADCY9* and *CETP* SNPs on both respiratory and cardiovascular  
335 phenotypes differs between the sexes, with effects on respiratory phenotypes limited to females  
336 (Supplementary Fig. 12a) and cardiovascular disease phenotype associations showing significant  
337 three-way sex-by-SNPs effects (Fig. 5). Furthermore, the LRLD signal is present mainly in males  
338 (Fig. 3), although the genotype association is also seen in female for a different genotype  
339 combination, suggesting the presence of sex-specific selection. This type of selection is very  
340 difficult to detect, especially on autosomes, with very few empirical examples found to date in the  
341 human genome despite strong theoretical support of their occurrence (62). However, sexual  
342 dimorphism in gene expression between males and females on autosomal genes has been linked  
343 to evolutionary pressures (63–65), possibly with a contribution of epistasis. As the source of  
344 selection, we favor the hypothesis of differential survival over differential reproduction, because  
345 the genetic combination between *ADCY9* and *CETP* has high chances to be broken up by  
346 recombination at each generation. Even in the case where recombination is suppressed in males  
347 between these loci, they would still have equal chances to pass the favored combination to both  
348 males and females offspring, which would not explain the sex-specific LRLD signal. We see an  
349 enrichment for the rs1967309-AA + rs158477-GG in males and rs1967309-AA + rs158477-AA in  
350 females, which are the beneficial combination for CAD in the corresponding sex, possibly pointing  
351 to a sexually antagonistic selection pressure, where the fittest genotype combination depends on  
352 the sex.

353 Such two-gene selection signature, where only males show strong LRLD, can happen if a specific  
354 genotype combination is beneficial in creating males (through differential sperm cell fitness or in  
355 utero survival, for example) or if survival until adulthood is favored with a specific genotype  
356 combination compared to other genotypes. To distinguish between the two scenarios, we tested if



357 the LRLD signal between rs1967309 and rs158477 in the LIMAA cohort depends on age in males  
358 but did not detect significant age effects (Supplementary text). Lastly, it may be that the  
359 evolutionary pressure is linked to the sex chromosomes (66,67), and a three-way interaction  
360 between *ADCY9*, *CETP* and the Y chromosome, for example, remains to be explored.

361  
362 Despite the fact that we observed the LRLD signal between rs1967309 and rs158477 in two  
363 independent Peruvian cohorts, reducing the likelihood that our result is a false positive, one  
364 limitation is that the individuals were recruited in the same city (Lima) in both cohorts. However,  
365 we show that both populations are heterogeneous with respect to ancestry (Supplementary Fig. 2),  
366 suggesting that they likely represent accurately the Peruvian population. As recent admixture and  
367 population structure can strongly influence LRLD, we performed several analyses to consider  
368 these confounders, in the full cohorts and in the sex-stratified analyses. All analyses were robust  
369 to genome-wide and local ancestry patterns, such that our results are unlikely to be explained by  
370 these effects alone (extensive details are given in Supplementary text). Unfortunately, we did not  
371 have access to expression and phenotypic data from Peruvian individuals, which makes all the  
372 links between the selection pressures and the phenotype associations somewhat indirect. Future  
373 studies should focus on evaluating the phenotypic impact of the interaction specifically in  
374 Peruvians individuals, in cohorts such as the Population Architecture using Genomics and  
375 Epidemiology (PAGE) (68), in order to confirm the marginally significant associations found in  
376 European cohorts. Indeed, the Peruvian/Andean genomic background could be of importance for  
377 the interaction effect observed in this population, which reduces the power of discovery in  
378 individuals of unmatched ancestry. Another limitation is the low number of samples per tissue in  
379 GTEx and the cell composition heterogeneity per tissue and per sample (69), which can be partially

380 captured by PEER factors and can modulate the eQTL effects. Therefore, our power to detect  
381 tissue-specific interaction effects is reduced in this dataset, making it quite remarkable that we  
382 were able to observe multiple nominally significant interaction effects between the loci.

383

384 In this study, we discovered a putative epistatic interaction between the pharmacogene *ADCY9*  
385 and the drug target gene *CETP*, that appears to be under selection in the Peruvian population. Our  
386 approach exemplifies the potential of using evolutionary analyses to help find relationships  
387 between pharmacogenes and their drug targets. We characterized the impact of the *ADCY9/CETP*  
388 interaction on a range of phenotypes and tissues. Our gene expression results in brain tissues  
389 suggest that the interaction could play a role in protection against challenges to the nervous system  
390 caused by stress such as hypoxia. In light of the associations between high altitude-induced  
391 hypoxia and cardiovascular system changes, the interaction identified in this study could be  
392 involved in both systems: for example, *ADCY9* and *CETP* could act in pathways involved in  
393 adaptation to high altitude, which could influence cardiovascular risk via their interaction,  
394 potentially in a sex-specific manner. Finally, our findings of an evolutionary relationship between  
395 *ADCY9* and *CETP* during recent human evolution points towards a biological link between  
396 dalcetrapib's pharmacogene *ADCY9* and its therapeutic target *CETP*.

397

## 398 **Material and Methods**

399

### 400 **Population Genetics Datasets**

401 The whole-genome sequencing data from the 1000 Genomes project (1000G) Phase III dataset  
402 (<ftp://ftp.1000genomes.ebi.ac.uk/vol1/ftp/release/20130502/>) was filtered to exclude INDELs and

403 CNVs so that we kept only biallelic SNPs. This database has genomic variants of 2,504 individuals  
404 across five ancestral populations: Africans (AFR,  $n = 661$ ), Europeans (EUR,  $n = 503$ ), East Asians  
405 (EAS,  $n = 504$ ), South Asians (SAS,  $n = 489$ ) and Americans (AMR,  $n = 347$ ) (70). The replication  
406 dataset, LIMAA, has been previously published (31,32) and was accessed through dbGaP  
407 [phs002025.v1.p1, dbgap project #26882]. We excluded related individuals as reported previously  
408 (31), resulting in a final dataset of 3,509 Peruvians, including 1,433 females and 2,076 males, for  
409 analysis. We also identified fine-scale population structure in this cohort and a more homogeneous  
410 subsample of 3,243 individuals (1,302 females and 1,941 males) in this cohort was kept for  
411 analysis (Supplementary text). The Native American genetic dataset (NAGD) contains 2,351  
412 individuals from Native descendants from the data from a previously published study (23).  
413 Individuals were separated by their linguistic families identified by Reich and colleagues (23).  
414 NAGD came under the Hg18 coordinates, so a lift over was performed to transfer to the hg19  
415 genome coordinates. Pre-processing details for these datasets are described in Supplementary text.

#### 416 **eQTL Datasets**

417 We used several datasets for which we had both RNA-seq data and genotyping. First, the  
418 GEUVADIS dataset (33) for 1000G individuals was used (available at  
419 <https://www.internationalgenome.org/data-portal/data-collection/geuvadis>). A total of 285 non-  
420 duplicated European samples (CEU, GBR, FIN, TSI) were kept for analysis. Second, the  
421 Genotype-Tissue Expression v8 (GTEx) (34) was accessed through dbGaP (phs000424.v8.p2,  
422 dbgap project #19088) and contains gene expression across 54 tissues and 948 donors, genetic and  
423 phenotypic information. Phenotype analyses are described in Supplementary text. The cohort  
424 contains 67% of males and 33% of females, mainly of European descent (84.6%), aged between  
425 20 and 79 years old. Analyses were done on 699 individuals. Third, we used the data from the

426 CARTaGENE biobank (35) (CAG project number 406713) which includes 790 RNA-seq whole-  
427 blood samples with genotype data, from individuals from Quebec (Canada) aged between 36 and  
428 72 years old. Genotyping and RNA-seq data processing pipelines for these datasets are detailed in  
429 **Supplementary text**. To quantify *ADCY9* gene expression, we removed the isoform transcript  
430 ENST00000574721.1 (*ADCY9*-205 from the Hg38) from the Gene Transfer Format (GTF) file  
431 because it is a “retained intron” and accumulates genomic noise (**Supplementary text**), masking  
432 true signals for *ADCY9*. To take into account hidden factors, we calculated PEER factors (71) on  
433 the normalized expressions. To detect eQTL effects, we performed a two-sided linear regression  
434 on *ADCY9* and *CETP* expressions using R (v.3.6.0) (<https://www.r-project.org/>) with the formula  
435  $lm(p \sim rs1967309 * rs158477 + Covariates)$  for evaluating the interaction effect and  
436  $lm(p \sim rs1967309 + rs158477 + Covariates)$  for the main effect of the SNPs. Under the  
437 additive model, each SNP is coded by the number of non-reference alleles (G for rs1967309 and  
438 A for rs158477), under the genotypic model, dummy coding is used with homozygous reference  
439 genotype set as reference. The covariates include the first 5 Principal Components (PCs), age  
440 (except for GEUVADIS, information not available), sex, as well as PEER factors. We tested the  
441 robustness of our results to the inclusion of different numbers of PEER factors in the models and  
442 we report them all for GEUVADIS, CARTaGENE and GTEx (**Supplementary Fig. 10, 11**).  
443 Reported values in the text are for five PEER factors in GEUVADIS and ten PEER factors in  
444 CARTaGENE. Covariates specific to each cohort are reported in **Supplementary text**.

445

#### 446 **UK biobank processing and selected phenotypes**

447 The UK biobank contains 487,392 genotyped individuals from the UK still enrolled as of August  
448 20<sup>th</sup> 2020, imputed using the Haplotype Reference Consortium as the main reference panel, and

449 accessed through project #15357 and UKB project #20168. Additional genetic quality control was  
450 done using pyGenClean (v.1.8.3) (72). Variants or individuals with more than 2% missing  
451 genotypes were filtered out. Individuals with discrepancies between the self-reported and genetic  
452 sex or with aneuploidies were removed from the analysis. We considered only individuals of  
453 European ancestry based on principal components (PCs), as it is the largest population in the UK  
454 Biobank, and because ancestry can be a confounder of the genetic effect on phenotypes. We used  
455 the PCs from UK Biobank to define a region in PC space using individuals identified as “white  
456 British ancestry” as a reference population. Using the kinship estimates from the UK Biobank, we  
457 randomly removed individuals from kinship pairs where the coefficient was higher than 0.0884  
458 (corresponding to a 3<sup>rd</sup> degree relationship). The resulting post QC dataset included 413,083  
459 individuals. For the reported phenotypes, the date of baseline visit was between 2006 and 2010.  
460 The latest available hospitalization records discharge date was June 30<sup>th</sup> 2020 and the latest date  
461 in the death registries was February 14<sup>th</sup> 2018. We used algorithmically-defined cardiovascular  
462 outcomes based on combinations of operation procedure codes (OPCS) and hospitalization or  
463 death record codes (ICD9/ICD10). A description of the tested continuous variables can be found  
464 in [Supplementary Table 1](#). We used age at recruitment defined in variable #21022 and sex in  
465 variable #31. We ignored self-reported events for cardiovascular outcomes as preliminary analyses  
466 suggested they were less precise than hospitalization and death records.

467 In association models, each SNP analyzed is coded by the number of non-reference alleles, G for  
468 rs1967309 and A for rs158477. SNP rs1967309 was also coded as a genotypic variable, to allow  
469 for non-additive effects. For continuous traits ([Supplementary Table 1](#)) in the UK Biobank, general  
470 two-sided linear models (GLM) were performed using SAS software (v.9.4). A GLM model was  
471 first performed using the covariates age, sex and PCs 1 to 10. The externally studentized residuals

472 were used to determine the outliers, which were removed. The normality assumption was  
473 confirmed by visual inspection of residuals for the majority of the outcomes, except *birthwt* and  
474 *sleep*. For biomarkers and cardiovascular endpoints, regression analyses were done in R (v.3.6.1).  
475 Linear regression analyses were conducted on standardized outcomes and logistic regression was  
476 used for cardiovascular outcomes. Marginal effects were calculated using margins package in R.  
477 In both cases, models were adjusted for age at baseline and top 10 PCs, as well as sex when not  
478 stratified. In models assessing two-way (rs1967309 by rs158477) or three-way (rs1967309 by  
479 rs158477 by sex) interactions, we used a 2 d.f. likelihood ratio test for the genotypic dummy  
480 variables' interaction terms (genotypic model) (Supplementary text).

481

#### 482 **RNA-sequencing of ADCY9-knocked-down HepG2 cell line**

483 The human liver hepatocellular HepG2 cell line was obtained from ATCC. Cells were cultured in  
484 EMEM Minimum essential Medium Eagle's, supplemented with 10% fetal bovine serum (Wisent  
485 Inc). 250 000 cells in 2 ml of medium in a six-well plate were transfected using 12.5 pmol of  
486 Silencer Select siRNA against human ADCY9 (Ambion cat # 4390826 ID 1039) or Negative  
487 Control siRNA (Ambion cat #4390844) with 5 µl of Lipofectamine RNAiMAX reagent  
488 (Invitrogen cat #13778) in 500 µl Opti-MEM I reduced serum medium (Invitrogen cat # 31985)  
489 for 72h. The experiment was repeated five times at different cell culture passages. Total RNA was  
490 extracted from transfected HepG2 cells using RNeasy Plus Mini Kit (Qiagen cat #74136) in  
491 accordance with the manufacturer's recommendation. Preparation of sequencing library and  
492 sequencing was performed at the McGill University Innovation Center. Briefly, ribosomal RNA  
493 was depleted using NEBNext rRNA depletion kit. Sequencing was performed using Illumina  
494 NovaSeq 6000 S2 paired end 100 bp sequencing lanes. Basic QC analysis of the 10 samples was

495 performed by the Canadian Centre for Computational Genomics (C3G). To process the RNA-seq  
496 samples, we first performed read trimming and quality clipping using TrimGalore! (73)  
497 (<https://github.com/FelixKrueger/TrimGalore>), we aligned the trimmed reads on the GRCh38  
498 reference genome using STAR (v.2.6.1a) and we ran RSEM (v.1.3.1) on the transcriptome aligned  
499 libraries. Prior to normalization with limma and voom, we filtered out genes which had less than  
500 6 reads in more than 5 samples. For ADCY9 and CETP gene-level differential expression analyses,  
501 we compared the mean of each group of replicates with a t-test for paired samples. The  
502 transcriptome-wide differential expression analysis was done using limma, on all genes having an  
503 average of at least 10 reads across samples from a condition. Samples were paired in the  
504 experiment design. The multiple testing was taken into account by correcting the p-values with the  
505 qvalue R package (v.4.0.0) (74), to obtain transcriptome-wide FDR values.

506

### 507 **Natural selection analyses**

508 We used the integrated Haplotype Statistic (iHS) (22) and the population branch statistic (PBS)  
509 (70) to look for selective signatures. The iHS values were computed for the each 1000G  
510 population. An absolute value of iHS above 2 is considered to be a genome wide significant signal  
511 (22). Prior to iHS computation, ancestral alleles were retrieved from 6 primates using the EPO  
512 pipeline (version e59) (75) and the filtered 1000 Genomes vcf files were converted to change the  
513 reference allele as ancestral allele using bcftools (76) with the fixref plugin. The hapbin program  
514 (v.1.3.0) (77) was then used to compute iHS using per population-specific genetic maps computed  
515 by Adam Auton on the 1000G OMNI dataset  
516 ([ftp://ftp.1000genomes.ebi.ac.uk/vol1/ftp/technical/working/20130507\\_omni\\_recombination\\_rat](ftp://ftp.1000genomes.ebi.ac.uk/vol1/ftp/technical/working/20130507_omni_recombination_rat)

517 [es](#)). When the genetic map was not available for a subpopulation, the genetic map from the closest  
518 sub-population was selected according to their global  $F_{ST}$  value computed on the phase 3 dataset.  
519 We scanned the *ADCY9* and *CETP* genes using the population branch statistic (PBS), using 1000G  
520 sub-populations data. PBS summarizes a three-way comparison of allele frequencies between two  
521 closely related populations, and an outgroup. The grouping we focused on was PEL/MXL/CHB,  
522 with PEL being the focal population to test if allele frequencies are especially differentiated from  
523 those in the other populations. The CHB population was chosen as an outgroup to represent a  
524 Eurasian population that share common ancestors in the past with the American populations, after  
525 the out-of-Africa event. Using PJJ (South Asia) and CEU (Europe) as an outgroup, or CLM as a  
526 closely related population (instead of MXL) yield highly similar results. To calculate  $F_{ST}$  for each  
527 pair of population in our tree, we used *vcftools* (78) by subpopulation. We calculated normalized  
528 PBS values as in (21), which adjusts values for positions with large branches in all populations,  
529 for the whole genome. We use this distribution to define an empirical threshold for significance  
530 based on the 95<sup>th</sup> percentile of all PBS values genome-wide for each of the three populations.

531

### 532 **Long-range linkage disequilibrium**

533 Long-range linkage disequilibrium (LRLD) was calculated using the function *geno-r2* of *vcftools*  
534 (v.0.1.17) which uses the genotype frequencies. LRLD was evaluated in all subpopulations from  
535 1000 Genomes Project Phase III, in LIMAA and NAGD, for all biallelic SNPs in *ADCY9*  
536 (chr16:4,012,650-4,166,186 in Hg19 genome reference) and *CETP* (chr16:56,995,835-57,017,756  
537 in Hg19 genome reference). We analyzed loci from the phased VCF files that had a MAF of at  
538 least 5% and a missing genotype of at most 10%, in order to retain a maximum of SNPs in NAGD  
539 which has higher missing rates than the others. We extracted the 99<sup>th</sup> percentile of all pairs of



540 comparisons between *ADCY9* and *CETP* genes to use as a threshold for empirical significance and  
541 we refer to these as *ADCY9/CETP* empirical p-values (Supplementary text). In LIMAA, we also  
542 evaluated the genotypic association using a  $\chi^2$  test with four degrees of freedom ( $\chi^2_4$ ) using a  
543 permutation test, as reported in (25) (Supplementary text).

544 Furthermore, for both cohorts, we created a distribution of LRLD values for random pairs of SNPs  
545 across the genome to obtain a genome-wide null distribution of LRLD to evaluate how unusual  
546 the genotypic association between our candidate SNPs (rs1967309-rs158477) is while taking into  
547 account the cohort-specific background genomic noise/admixture and allele frequencies. We  
548 extracted 3,513 pairs of SNPs that match rs1967309 and rs158477 in terms of MAF, physical  
549 distance (in base pairs) and genetic distance (in centiMorgans (cM), based on the PEL genetic  
550 map) between them in both cohorts (Supplementary text), and report genome-wide empirical p-  
551 values based on this distribution. For the analyses of LRLD between *ADCY9* and *CETP* stratified  
552 by sex, we considered the same set of SNP pairs that we used for the full cohorts, but separated  
553 the dataset by sex before calculating the LRLD values. To evaluate how likely the differences  
554 observed in LRLD between sex are, we also performed permutations of the sex labels across  
555 individuals to create a null distribution of sex specific effects (Supplementary text).

556

### 557 **Local ancestry inference**

558 To evaluate local ancestry in the PEL subpopulation and in the LIMAA cohort, we constructed a  
559 reference panel using the phased haplotypes from 1000 Genomes (YRI, CEU, CHB) and the  
560 phased haplotypes of NAGD (Northern American, Central American and Andean)  
561 (Supplementary text). We kept overlapping positions between all datasets, and when SNPs had the  
562 exact same genetic position, we kept the SNP with the highest variance in allele frequencies across

563 all reference populations (Supplementary text). We ran RFMix (v.2.03) (79) (with the option  
564 ‘reanalyze-reference’ and for 25 iterations) on all phased chromosomes. We estimated the whole  
565 genome average proportion of each ancestry using a weighted mean of the chromosome specific  
566 proportions given by RFMix based on the chromosome size in cM. For comparing the overall  
567 Andean enrichment inferred by RFMix between rs1967309/rs158477 genotype categories, we  
568 used a two-sided Wilcoxon-t-test. To evaluate the Andean local ancestry enrichment specifically  
569 at *ADCY9* and *CETP*, we computed the genome-wide 95<sup>th</sup> percentile for proportion of Andean  
570 attribution for all intervals given by RFMix.

571 **Supplemental Information description**

572 Supplementary figures 1-14

573 Supplementary tables 1-2

574 Supplementary methods and texts

575

576 **Acknowledgements**

577 We thank all members of the Hussin lab for their constructive comments and feedback throughout  
578 this project. This work was completed thanks to computational resources provided by Compute  
579 Canada clusters Graham and Beluga. This work was funded by the *Institut de Valorisation des*  
580 *Données* (IVADO) and the Montreal Heart Institute (MHI) Foundation. J.G.H. is a *Fonds de la*  
581 *Recherche en Santé* (FRQS) Junior 1 fellow. I.G. receives a PhD scholarship from the MHI  
582 Foundation and M.A.L. holds a PhD scholarship from Canadian Institutes of Health Research.  
583 M.P.D. holds the Canada Research Chair in Precision Medicine Data Analysis. J.C.T. holds the  
584 Canada Research Chair in Personalized Medicine and the Université de Montréal endowed  
585 research chair in atherosclerosis.

586

587 **Author Contributions**

588 Conceptualization: I.G., M.P.D and J.G.H.; Data curation: I.G., M.A.L., J.C.G.; Statistical and  
589 bioinformatic analyses: I.G., M.A.L., J.C.G., H.T, S.A, A.B. and Y.F.Z.; Data acquisition: J.C.G.,  
590 J.G.H, Y.L., L.L., M.M. and S.R.; Wet lab experimentation: R.S. and E.R.; Writing – Original  
591 draft: I.G. and J.G.H.; Writing – Review & editing: I.G., M.A.L., J.C.G., R.S., E.R., S.A., H.T.,  
592 Y.L., S.R., J.C.T., M.P.D. and J.G.H.; Supervision: J.C.T., M.P.D. and J.G.H.; Funding  
593 acquisition: J.C.T., M.P.D., J.G.H.

594 **Competing Interests statement**

595 J.G.H. has received speaker honoraria from Dalcors and District 3 Innovation Centre. J.C.T. reports  
596 grants from Government of Quebec, National Heart, Lung, and Blood Institute of the U.S. National  
597 Institutes of Health (NIH), the MHI Foundation, from Bill and Melinda Gates Foundation, Amarin,  
598 Esperion, Ionis, Servier, RegenXBio; personal fees from AstraZeneca, Sanofi, Servier; and  
599 personal fees and minor equity interest from Dalcors. M.P.D. and J.C.T. have a patent Methods for  
600 Treating or Preventing Cardiovascular Disorders and Lowering Risk of Cardiovascular Events  
601 issued to Dalcors, no royalties received, a patent Genetic Markers for Predicting Responsiveness to  
602 Therapy with HDL-Raising or HDL Mimicking Agent issued to Dalcors, no royalties received, and  
603 a patent Methods for using low dose colchicine after myocardial infarction with royalties paid to  
604 Invention assigned to the Montreal Heart Institute. M.P.D. reports personal fees and other from  
605 Dalcors and personal fees from GlaxoSmithKline, other from AstraZeneca, Pfizer, Servier, Sanofi.  
606 The remaining authors have nothing to disclose.

## 607 References

- 608 1. Lagrost L. Regulation of cholesteryl ester transfer protein (CETP) activity: review of in  
609 vitro and in vivo studies. *Biochim Biophys Acta*. 1994 Dec 8;1215(3):209–36.
- 610 2. Shinkai H. Cholesteryl ester transfer-protein modulator and inhibitors and their potential  
611 for the treatment of cardiovascular diseases. *Vasc Health Risk Manag*. 2012;8:323–31.
- 612 3. Schwartz GG, Olsson AG, Abt M, Ballantyne CM, Barter PJ, Brumm J, et al. Effects of  
613 dalcetrapib in patients with a recent acute coronary syndrome. *N Engl J Med*. 2012 Nov  
614 29;367(22):2089–99.
- 615 4. Tardif J-C, Rhéaume E, Lemieux Perreault L-P, Grégoire JC, Feroz Zada Y, Asselin G, et  
616 al. Pharmacogenomic determinants of the cardiovascular effects of dalcetrapib. *Circ Cardiovasc*  
617 *Genet*. 2015 Apr;8(2):372–82.
- 618 5. Tardif J-C, Rhoads D, Brodeur M, Feroz Zada Y, Fouodjio R, Provost S, et al.  
619 Genotype-dependent effects of dalcetrapib on cholesterol efflux and inflammation. *Circ*  
620 *Cardiovasc Genet*. 2016 Aug;9(4):340–8.
- 621 6. Rautureau Y, Deschambault V, Higgins M-È, Rivas D, Mecteau M, Geoffroy P, et al.  
622 ADCY9 (Adenylate Cyclase Type 9) inactivation protects from atherosclerosis only in the  
623 absence of CETP (Cholesteryl Ester Transfer Protein). *Circulation*. 2018 Oct 16;138(16):1677–  
624 92.
- 625 7. Bersaglieri T, Sabeti PC, Patterson N, Vanderploeg T, Schaffner SF, Drake JA, et al.  
626 Genetic signatures of strong recent positive selection at the lactase gene. *Am J Hum Genet*. 2004  
627 Jun;74(6):1111–20.
- 628 8. Enattah NS, Trudeau A, Pimenoff V, Maiuri L, Auricchio S, Greco L, et al. Evidence of  
629 still-ongoing convergence evolution of the lactase persistence T-13910 alleles in humans. *Am J*  
630 *Hum Genet*. 2007 Sep;81(3):615–25.
- 631 9. Gamba C, Jones ER, Teasdale MD, McLaughlin RL, Gonzalez-Fortes G, Mattiangeli V,  
632 et al. Genome flux and stasis in a five millennium transect of European prehistory. *Nature*  
633 *Communications*. 2014 Oct 21;5(1):5257.
- 634 10. Itan Y, Powell A, Beaumont MA, Burger J, Thomas MG. The origins of lactase  
635 persistence in Europe. *PLOS Computational Biology*. 2009 Oct 5;5(8):e1000491.
- 636 11. Poulter M, Hollox E, Harvey CB, Mulcare C, Peuhkuri K, Kajander K, et al. The causal  
637 element for the lactase persistence/non-persistence polymorphism is located in a 1 Mb region of  
638 linkage disequilibrium in Europeans. *Ann Hum Genet*. 2003 Jul;67(Pt 4):298–311.
- 639 12. Labrie V, Buske OJ, Oh E, Jeremian R, Ptak C, Gasiūnas G, et al. Lactase non-  
640 persistence is directed by DNA variation-dependent epigenetic aging. *Nat Struct Mol Biol*. 2016  
641 Jun;23(6):566–73.
- 642 13. Yi X, Liang Y, Huerta-Sanchez E, Jin X, Cuo ZXP, Pool JE, et al. Sequencing of fifty  
643 human exomes reveals adaptation to high altitude. *Science*. 2010 Jul 2;329(5987):75–8.
- 644 14. Fumagalli M, Moltke I, Grarup N, Racimo F, Bjerregaard P, Jørgensen ME, et al.  
645 Greenlandic Inuit show genetic signatures of diet and climate adaptation. *Science*. 2015 Sep  
646 18;349(6254):1343.
- 647 15. Hollenbach JA, Thomson G, Cao K, Fernandez-Vina M, Erlich HA, Bugawan TL, et al.  
648 HLA diversity, differentiation, and haplotype evolution in Mesoamerican Natives. *Human*  
649 *Immunology*. 2001 Apr 1;62(4):378–90.
- 650 16. Li P, Zhao J, Kothapalli KSD, Li X, Li H, Han Y, et al. A regulatory insertion-deletion  
651 polymorphism in the FADS gene cluster influences PUFA and lipid profiles among Chinese

- 652 adults: a population-based study. *The American Journal of Clinical Nutrition*. 2018 Jun  
653 1;107(6):867–75.
- 654 17. Reynolds LM, Dutta R, Seeds MC, Lake KN, Hallmark B, Mathias RA, et al. FADS  
655 genetic and metabolomic analyses identify the  $\Delta 5$  desaturase (FADS1) step as a critical control  
656 point in the formation of biologically important lipids. *Scientific Reports*. 2020 Sep  
657 28;10(1):15873.
- 658 18. Tashi T, Scott Reading N, Wuren T, Zhang X, Moore LG, Hu H, et al. Gain-of-function  
659 EGLN1 prolyl hydroxylase (PHD2 D4E:C127S) in combination with EPAS1 (HIF-2 $\alpha$ )  
660 polymorphism lowers hemoglobin concentration in Tibetan highlanders. *J Mol Med*. 2017 Jun  
661 1;95(6):665–70.
- 662 19. Meyer D, C. Aguiar VR, Bitarello BD, C. Brandt DY, Nunes K. A genomic perspective  
663 on HLA evolution. *Immunogenetics*. 2018 Jan 1;70(1):5–27.
- 664 20. Blais M-E, Zhang Y, Rostron T, Griffin H, Taylor S, Xu KY, et al. High frequency of  
665 HIV mutations associated with HLA-C suggests enhanced HLA-C-restricted CTL selective  
666 pressure associated with an AIDS-protective polymorphism. *J Immunol*. 2012 May  
667 1;188(9):4663–70.
- 668 21. Crawford JE, Amaru R, Song J, Julian CG, Racimo F, Cheng JY, et al. Natural selection  
669 on genes related to cardiovascular health in high-altitude adapted Andeans. *Am J Hum Genet*.  
670 2017 Nov 2;101(5):752–67.
- 671 22. Voight BF, Kudaravalli S, Wen X, Pritchard JK. A map of recent positive selection in the  
672 human genome. *PLOS Biology*. 2006 Mar 7;4(3):e72.
- 673 23. Reich D, Patterson N, Campbell D, Tandon A, Mazieres S, Ray N, et al. Reconstructing  
674 Native American population history. *Nature*. 2012 Aug;488(7411):370–4.
- 675 24. Lewontin RC, Kojima K. The evolutionary dynamics of complex polymorphisms.  
676 *Evolution*. 1960;14(4):458–72.
- 677 25. Rohlfs RV, Swanson WJ, Weir BS. Detecting coevolution through allelic association  
678 between physically unlinked loci. *The American Journal of Human Genetics*. 2010 May  
679 14;86(5):674–85.
- 680 26. Harris DN, Song W, Shetty AC, Levano KS, Cáceres O, Padilla C, et al. Evolutionary  
681 genomic dynamics of Peruvians before, during, and after the Inca Empire. *Proc Natl Acad Sci U*  
682 *S A*. 2018 Jul 10;115(28):E6526–35.
- 683 27. Li W-H, Nei M. Stable linkage disequilibrium without epistasis in subdivided  
684 populations. *Theoretical Population Biology*. 1974 Oct 1;6(2):173–83.
- 685 28. Nei M, Li WH. Linkage disequilibrium in subdivided populations. *Genetics*. 1973  
686 Sep;75(1):213–9.
- 687 29. Park L. Population-specific long-range linkage disequilibrium in the human genome and  
688 its influence on identifying common disease variants. *Scientific Reports*. 2019 Aug 6;9(1):11380.
- 689 30. Slatkin M. Linkage disequilibrium — understanding the evolutionary past and mapping  
690 the medical future. *Nat Rev Genet*. 2008 Jun;9(6):477–85.
- 691 31. Asgari S, Luo Y, Akbari A, Belbin GM, Li X, Harris DN, et al. A positively selected  
692 FBN1 missense variant reduces height in Peruvian individuals. *Nature*. 2020 Jun;582(7811):234–  
693 9.
- 694 32. Luo Y, Suliman S, Asgari S, Amariuta T, Baglaenko Y, Martínez-Bonet M, et al. Early  
695 progression to active tuberculosis is a highly heritable trait driven by 3q23 in Peruvians. *Nat*  
696 *Commun*. 2019 Aug 21;10(1):3765.
- 697 33. Lappalainen T, Sammeth M, Friedländer MR, ‘t Hoen PAC, Monlong J, Rivas MA, et al.

- 698 Transcriptome and genome sequencing uncovers functional variation in humans. *Nature*. 2013  
699 Sep;501(7468):506–11.
- 700 34. The Genotype-Tissue Expression (GTEx) project. *Nat Genet*. 2013 Jun;45(6):580–5.
- 701 35. Awadalla P, Boileau C, Payette Y, Idaghmour Y, Goulet J-P, Knoppers B, et al. Cohort  
702 profile of the CARTaGENE study: Quebec’s population-based biobank for public health and  
703 personalized genomics. *Int J Epidemiol*. 2013 Oct;42(5):1285–99.
- 704 36. Brynedal B, Choi J, Raj T, Bjornson R, Stranger BE, Neale BM, et al. Large-scale trans-  
705 eQTLs affect hundreds of transcripts and mediate patterns of transcriptional co-regulation. *Am J*  
706 *Hum Genet*. 2017 Apr 6;100(4):581–91.
- 707 37. Beall CM. Two routes to functional adaptation: Tibetan and Andean high-altitude  
708 natives. *Proc Natl Acad Sci U S A*. 2007 May 15;104(Suppl 1):8655–60.
- 709 38. Brutsaert TD, Parra EJ, Shriver MD, Gamboa A, Rivera-Ch M, León-Velarde F.  
710 Ancestry explains the blunted ventilatory response to sustained hypoxia and lower exercise  
711 ventilation of Quechua altitude natives. *Am J Physiol Regul Integr Comp Physiol*. 2005  
712 Jul;289(1):R225-234.
- 713 39. Julian CG, Moore LG. Human genetic adaptation to high altitude: evidence from the  
714 Andes. *Genes (Basel)*. 2019 février;10(2):150.
- 715 40. Moore LG. Human genetic adaptation to high altitudes: current status and future  
716 prospects. *Quat Int*. 2017 Dec 15;461:4–13.
- 717 41. Milledge JS, West JB, Schoene RB. High altitude medicine and physiology [Internet]. 4th  
718 ed. CRC Press; 2007. Available from: <https://books.google.ca/books?id=lj59BgAAQBAJ>
- 719 42. Murray AJ. Energy metabolism and the high-altitude environment. *Experimental*  
720 *Physiology*. 2016;101(1):23–7.
- 721 43. Albers JJ, Tollefson JH, Wolfbauer G, Albright RE. Cholesteryl ester transfer protein in  
722 human brain. *Int J Clin Lab Res*. 1992;21(3):264–6.
- 723 44. Yamada T, Kawata M, Arai H, Fukasawa M, Inoue K, Sato T. Astroglial localization of  
724 cholesteryl ester transfer protein in normal and Alzheimer’s disease brain tissues. *Acta*  
725 *Neuropathol*. 1995 Dec 1;90(6):633–6.
- 726 45. Murphy EA, Roddey JC, McEvoy LK, Holland D, Hagler DJ, Dale AM, et al. CETP  
727 polymorphisms associate with brain structure, atrophy rate, and Alzheimer’s disease risk in an  
728 APOE-dependent manner. *Brain Imaging Behav*. 2012 Mar;6(1):16–26.
- 729 46. Oestereich F, Yousefpour N, Yang E, Ribeiro-da-Silva A, Chaurand P, Munter LM. The  
730 cholesteryl ester transfer protein (CETP) raises cholesterol levels in the brain and affects  
731 presenilin-mediated gene regulation. *bioRxiv*. 2020 Nov 24;2020.11.24.395186.
- 732 47. Lieberman P, Morey A, Hochstadt J, Larson M, Mather S. Mount Everest: a space  
733 analogue for speech monitoring of cognitive deficits and stress. *Aviat Space Environ Med*. 2005  
734 Jun;76(6 Suppl):B198-207.
- 735 48. Shukitt-Hale B, Stillman MJ, Welch DI, Levy A, Devine JA, Lieberman HR. Hypobaric  
736 hypoxia impairs spatial memory in an elevation-dependent fashion. *Behavioral and Neural*  
737 *Biology*. 1994 Nov 1;62(3):244–52.
- 738 49. Horiuchi J, McDowall LM, Dampney RAL. Vasomotor and respiratory responses evoked  
739 from the dorsolateral periaqueductal grey are mediated by the dorsomedial hypothalamus. *The*  
740 *Journal of Physiology*. 2009;587(21):5149–62.
- 741 50. Rahmouni K. Cardiovascular regulation by the arcuate nucleus of the hypothalamus:  
742 neurocircuitry and signaling systems. *Hypertension*. 2016 Jun;67(6):1064–71.
- 743 51. Bärtsch Peter, Gibbs J. Simon R. Effect of altitude on the heart and the lungs. *Circulation*.

- 744 2007 Nov 6;116(19):2191–202.
- 745 52. Hainsworth R, Drinkhill MJ, Rivera-Chira M. The autonomic nervous system at high  
746 altitude. *Clin Auton Res*. 2007 Feb;17(1):13–9.
- 747 53. Bigham AW, Lee FS. Human high-altitude adaptation: forward genetics meets the HIF  
748 pathway. *Genes Dev*. 2014 Oct 15;28(20):2189–204.
- 749 54. Moore LG. Measuring high-altitude adaptation. *J Appl Physiol* (1985). 2017 Nov  
750 1;123(5):1371–85.
- 751 55. Abe H, Semba H, Takeda N. The roles of hypoxia signaling in the pathogenesis of  
752 cardiovascular diseases. *J Atheroscler Thromb*. 2017 Sep 1;24(9):884–94.
- 753 56. Lee JW, Ko J, Ju C, Eltzschig HK. Hypoxia signaling in human diseases and therapeutic  
754 targets. *Exp Mol Med*. 2019 Jun 20;51(6):1–13.
- 755 57. Faeh D, Gutzwiller F, Bopp M, Swiss National Cohort Study Group. Lower mortality  
756 from coronary heart disease and stroke at higher altitudes in Switzerland. *Circulation*. 2009 Aug  
757 11;120(6):495–501.
- 758 58. Naeije R. Physiological adaptation of the cardiovascular system to high altitude. *Progress*  
759 *in Cardiovascular Diseases*. 2010 May 1;52(6):456–66.
- 760 59. Ostadal B, Kolar F. Cardiac adaptation to chronic high-altitude hypoxia: Beneficial and  
761 adverse effects. *Respiratory Physiology & Neurobiology*. 2007 Sep 30;158(2):224–36.
- 762 60. Riley CJ, Gavin M. Physiological changes to the cardiovascular system at high altitude  
763 and its effects on cardiovascular disease. *High Altitude Medicine & Biology*. 2017 Mar  
764 15;18(2):102–13.
- 765 61. Savla JJ, Levine BD, Sadek HA. The effect of hypoxia on cardiovascular disease: friend  
766 or foe? *High Alt Med Biol*. 2018 Jun;19(2):124–30.
- 767 62. Morrow EH, Connallon T. Implications of sex-specific selection for the genetic basis of  
768 disease. *Evol Appl*. 2013 Dec;6(8):1208–17.
- 769 63. Connallon T, Clark AG. Sex linkage, sex-specific selection, and the role of  
770 recombination in the evolution of sexually dimorphic gene expression. *Evolution*. 2010  
771 Dec;64(12):3417–42.
- 772 64. Parsch J, Ellegren H. The evolutionary causes and consequences of sex-biased gene  
773 expression. *Nature Reviews Genetics*. 2013 Feb;14(2):83–7.
- 774 65. Williams TM, Carroll SB. Genetic and molecular insights into the development and  
775 evolution of sexual dimorphism. *Nature Reviews Genetics*. 2009 Nov;10(11):797–804.
- 776 66. Cox RM, Cox CL, McGlothlin JW, Card DC, Andrew AL, Castoe TA. Hormonally  
777 mediated increases in sex-biased gene expression accompany the breakdown of between-sex  
778 genetic correlations in a sexually dimorphic lizard. *The American Naturalist*. 2017 Jan  
779 25;189(3):315–32.
- 780 67. McGlothlin JW, Cox RM, Brodie ED III. Sex-Specific Selection and the Evolution of  
781 Between-Sex Genetic Covariance. *Journal of Heredity*. 2019 Jul 1;110(4):422–32.
- 782 68. Wojcik GL, Graff M, Nishimura KK, Tao R, Haessler J, Gignoux CR, et al. Genetic  
783 analyses of diverse populations improves discovery for complex traits. *Nature*. 2019  
784 Jun;570(7762):514–8.
- 785 69. Aguet F, Brown AA, Castel SE, Davis JR, He Y, Jo B, et al. Genetic effects on gene  
786 expression across human tissues. *Nature*. 2017 Oct;550(7675):204–13.
- 787 70. Auton A, Abecasis GR, Altshuler DM, Durbin RM, Abecasis GR, Bentley DR, et al. A  
788 global reference for human genetic variation. *Nature*. 2015 Oct;526(7571):68–74.
- 789 71. Stegle O, Parts L, Piipari M, Winn J, Durbin R. Using probabilistic estimation of



- 790 expression residuals (PEER) to obtain increased power and interpretability of gene expression  
791 analyses. *Nat Protoc.* 2012 Feb 16;7(3):500–7.
- 792 72. Lemieux Perreault L-P, Provost S, Legault M-A, Barhdadi A, Dubé M-P. pyGenClean:  
793 efficient tool for genetic data clean up before association testing. *Bioinformatics.* 2013 Jul  
794 1;29(13):1704–5.
- 795 73. Martin M. Cutadapt removes adapter sequences from high-throughput sequencing reads.  
796 *EMBnet.journal.* 2011 May 2;17(1):10–2.
- 797 74. Storey JD. A direct approach to false discovery rates. *Journal of the Royal Statistical*  
798 *Society: Series B (Statistical Methodology).* 2002;64(3):479–98.
- 799 75. Herrero J, Muffato M, Beal K, Fitzgerald S, Gordon L, Pignatelli M, et al. Ensembl  
800 comparative genomics resources. *Database (Oxford)* [Internet]. 2016 Feb 20 [cited 2021 Feb  
801 23];2016. Available from: <https://www.ncbi.nlm.nih.gov/pmc/articles/PMC4761110/>
- 802 76. Li H, Handsaker B, Wysoker A, Fennell T, Ruan J, Homer N, et al. The sequence  
803 alignment/map format and SAMtools. *Bioinformatics.* 2009 Aug 15;25(16):2078–9.
- 804 77. Maclean CA, Chue Hong NP, Prendergast JGD. hapbin: an efficient program for  
805 performing haplotype-based scans for positive selection in large genomic datasets. *Molecular*  
806 *Biology and Evolution.* 2015 Nov 1;32(11):3027–9.
- 807 78. Danecek P, Auton A, Abecasis G, Albers CA, Banks E, DePristo MA, et al. The variant  
808 call format and VCFtools. *Bioinformatics.* 2011 Aug 1;27(15):2156–8.
- 809 79. Maples BK, Gravel S, Kenny EE, Bustamante CD. RFMix: a discriminative modeling  
810 approach for rapid and robust local-ancestry inference. *Am J Hum Genet.* 2013 Aug  
811 8;93(2):278–88.
- 812

813 **Main figures**

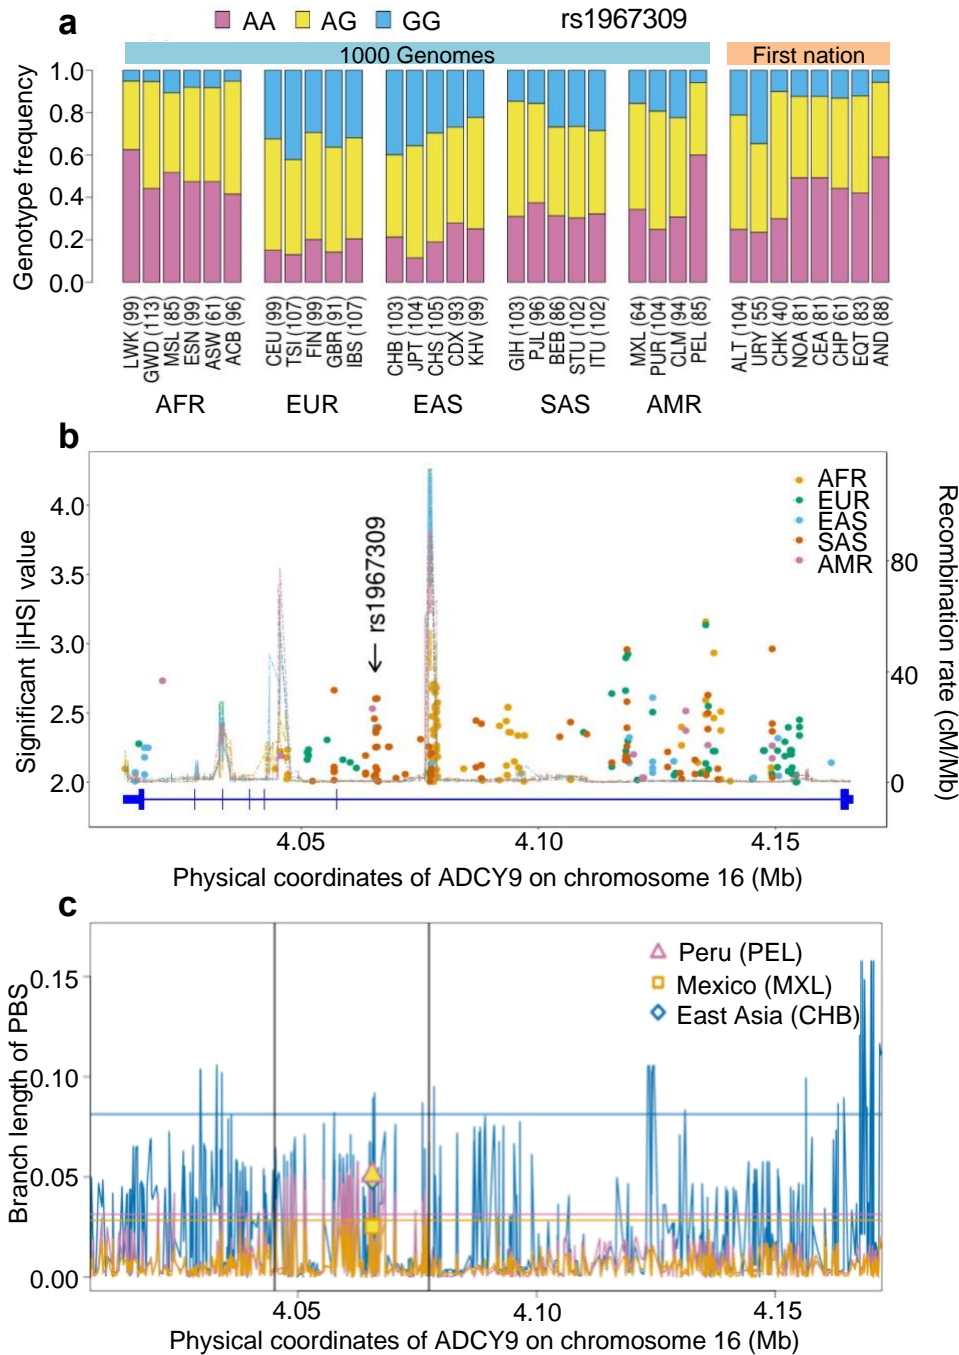

814

815 **Fig. 1. Natural selection signature at rs1967309 in ADCY9.** (A) Genotype frequency  
 816 distribution of rs1967309 in populations from the 1000 Genomes (1000G) Project and in Native  
 817 Americans. (B) Significant iHS values (absolute values above 2) for 1000G continental

818 populations and recombination rates from 1000G population-specific genetic maps, in the *ADCY9*  
819 gene. (C) PBS values in the *ADCY9*, comparing the CHB (outgroup), MXL and PEL. Horizontal  
820 lines represent the 95<sup>th</sup> percentile PBS value genome-wide for each population. Vertical black lines  
821 represent the highest recombination rates around rs1967309 from 1000G population-specific  
822 genetic maps. Abbreviations: Altaic from Mongolia and Russia: ALT; Uralic Yukaghir from  
823 Russia: URY; Chukchi Kamchatkan from Russia: CHK; Northern American from Canada,  
824 Guatemala and Mexico: NOA; Central American from Costal Rica and Mexico: CEA; Chibchan  
825 Paezan from Argentina, Bolivia, Colombia, Costa Rica and Mexico: CHP; Equatorial Tucanoan  
826 from Argentina, Brazil, Colombia, Gualana and Paraguay: EQT; Andean from Bolivia, Chile,  
827 Colombia and Peru: AND. For 1000G populations, abbreviations can be found here  
828 <https://www.internationalgenome.org/category/population/>.

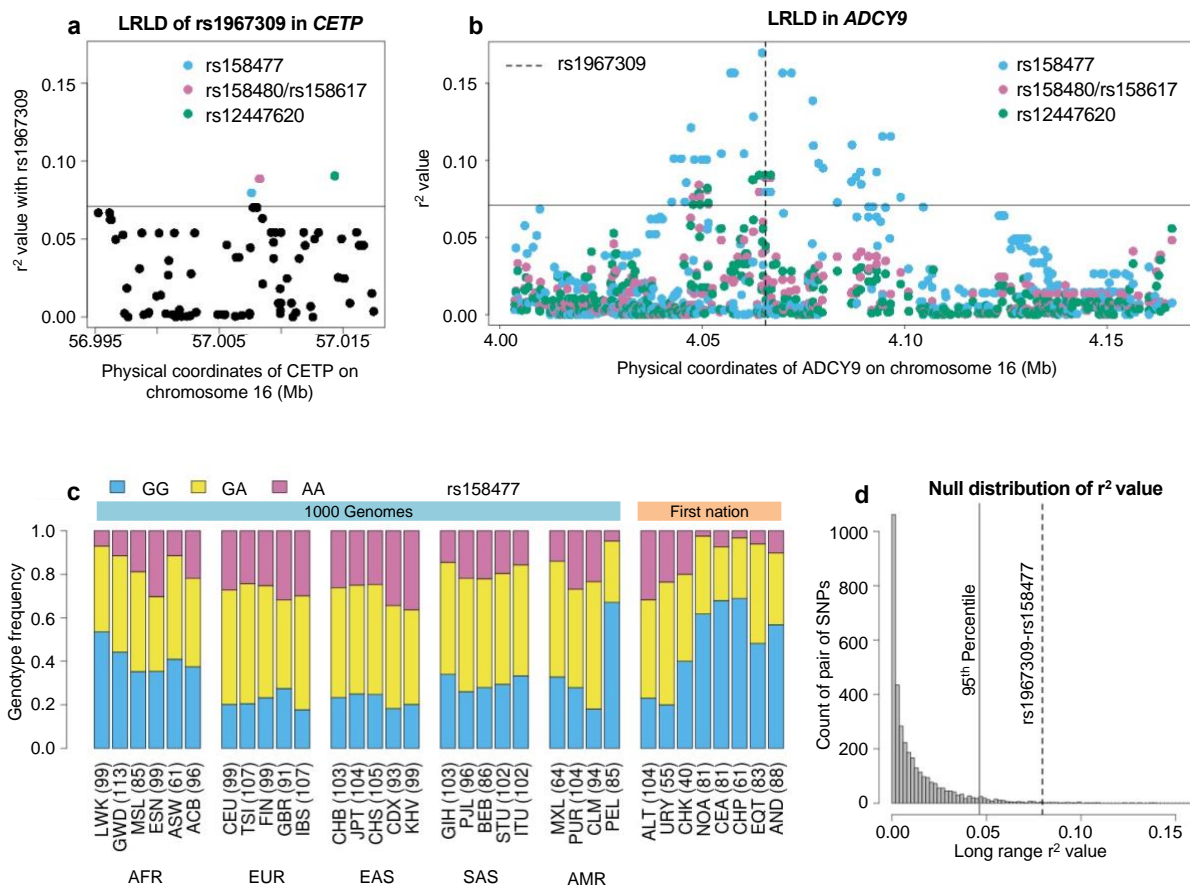

829

830 **Fig. 2. Long-range linkage disequilibrium between rs1967309 and rs158477 in Peruvians**

831 **from Lima, Peru.** (A) Genotype correlation ( $r^2$ ) between rs1967309 and all SNPs with MAF>5%

832 in *CETP*, for the PEL population. (B) Genotype correlation between the 3 loci identified in (a) to

833 be in the 99<sup>th</sup> percentile and all SNPs with MAF>5% in *ADCY9*. The dotted line indicates the

834 position of rs1967309. The horizontal lines in (a,b) represents the threshold for the 99<sup>th</sup> percentile

835 of all comparisons of SNPs (MAF>5%) between *ADCY9* and *CETP*. (C) Genotype frequency

836 distribution of rs158477 in 1000G and Native American populations. (D) Genomic distribution of

837  $r^2$  values from 3,513 pairs of SNPs separated by between 50-60 Mb and  $61 \pm 10$  cM away across all

838 Peruvian chromosomes from the PEL sample, compared to the rs1967309-rs158477  $r^2$  value

839 (dotted grey line) (genome-wide empirical p-value=0.01). The vertical black line shows the

840 threshold for the 95<sup>th</sup> percentile threshold of all pairs. Abbreviations: Altaic from Mongolia and  
841 Russia: ALT; Uralic Yukaghir from Russia: URY; Chukchi Kamchatkan from Russia: CHK;  
842 Northern American from Canada, Guatemala and Mexico: NOA; Central American from Costal  
843 Rica and Mexico: CEA; Chibchan Paezan from Argentina, Bolivia, Colombia, Costa Rica and  
844 Mexico: CHP; Equatorial Tucanoan from Argentina, Brazil, Colombia, Gualana and Paraguay:  
845 EQT; Andean from Bolivia, Chile, Colombia and Peru: AND. For 1000G populations,  
846 abbreviations can be found here <https://www.internationalgenome.org/category/population/>  
847

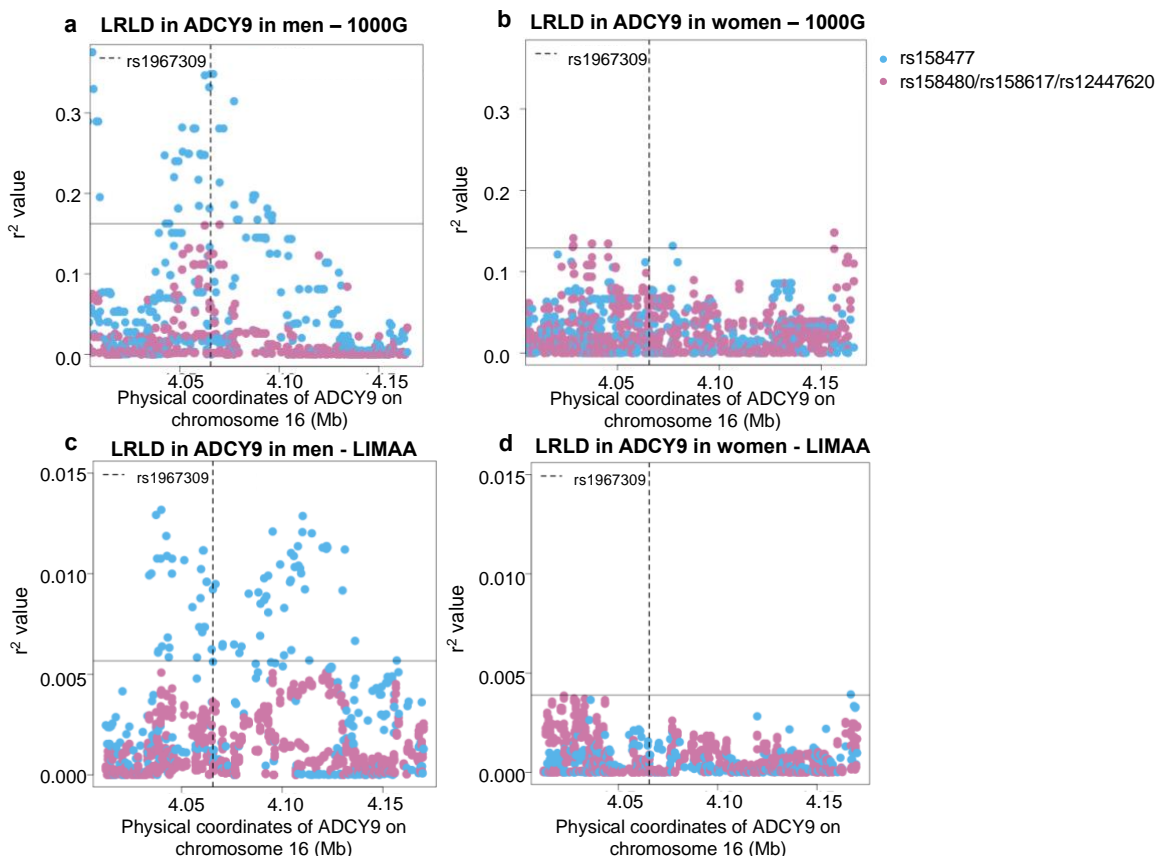

848

849 **Fig. 3. Sex-specific long-range linkage disequilibrium.** Genotype correlation between the loci  
850 identified in CETP in Figure 2A and all SNPs with MAF>5% in *ADCY9* for the PEL population  
851 (A,B) and LIMAA cohort (C,D) in males (A,C) and in females (B,D). SNPs rs158480, rs158617  
852 and rs12447620, are in near-perfect LD in these subsets. The horizontal line shows the threshold  
853 for the 99<sup>th</sup> percentile of all comparisons of SNPs (MAF>5%) between *ADCY9* and *CETP*. The  
854 dotted line represents the position of rs1967309. Blue dots represent the rs158477 SNPs and pink  
855 represents the other three SNPs identified in Figure 2A.

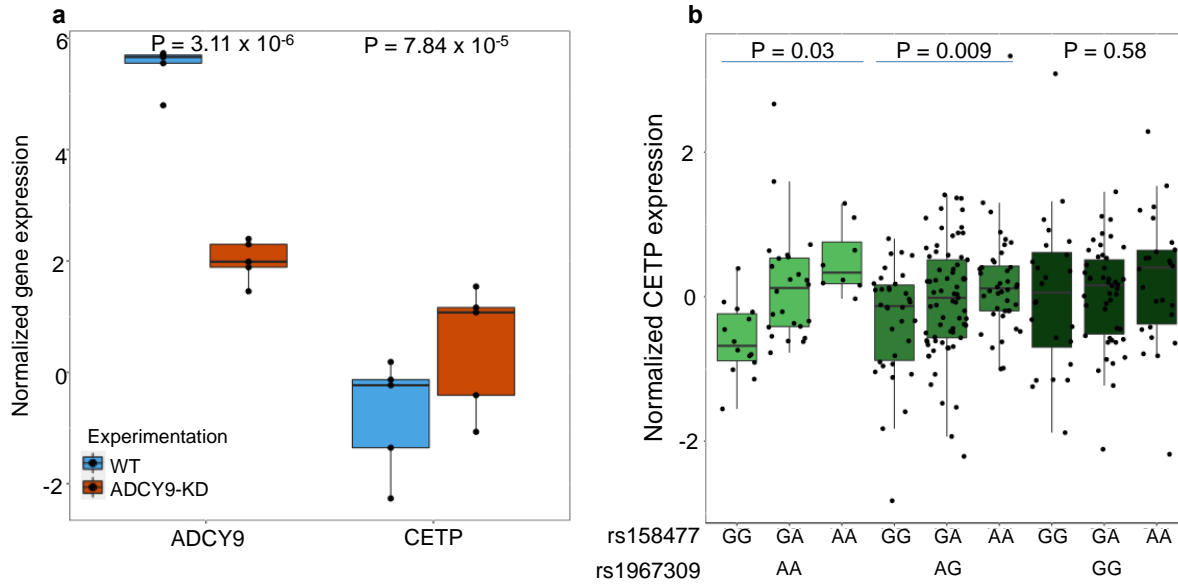

856

857 **Fig. 4. Effect of *ADCY9* on *CETP* expression.** (A) Normalized expression of *ADCY9* or *CETP*  
858 genes depending on wild type (WT) and *ADCY9-KD* in HepG2 cells from RNA sequencing on  
859 five biological replicates in each group. P-values were obtained from a two-sided Wilcoxon paired  
860 test. (B) *CETP* expression depending on the combination of rs1967309 and rs158477 genotypes  
861 in GEUVADIS for 285 individuals of European descent according to principal component  
862 analysis. P-values reported were obtained from a two-sided linear regression model after  
863 stratification by rs1967309 genotypes.

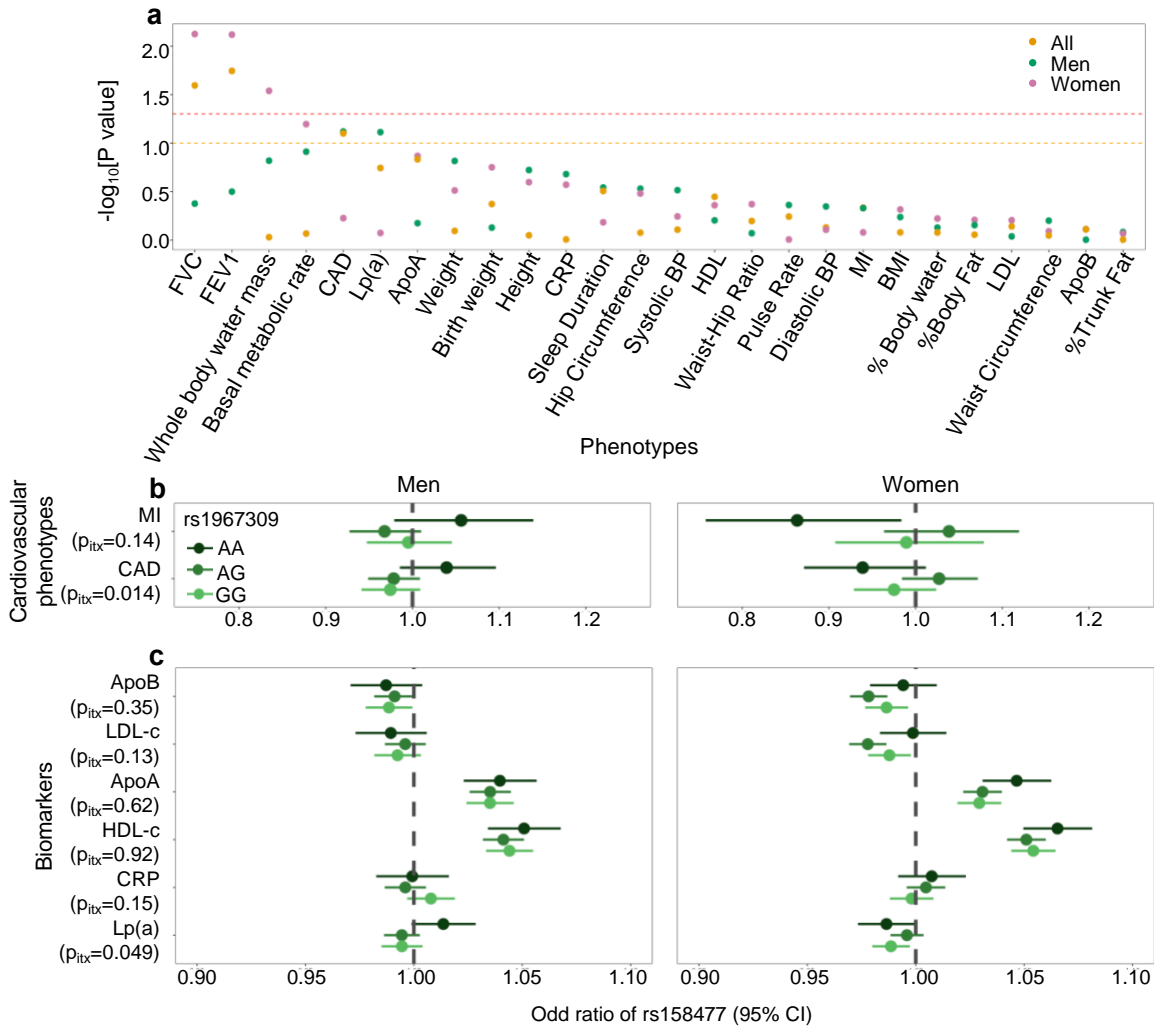

864

865 **Fig. 5. Epistatic association of rs1967309 and rs158477 on phenotypes in the UK biobank.**

866 Effect of the rs158477 SNP on cardiovascular phenotypes (A) and biomarkers (B) depending on

867 the genotype of rs1967309 (genotypic encoding) in males and females. The p-values  $p_{itx}$  reported

868 are from a likelihood ratio test comparing models with and without the three-way interaction term

869 between the SNPs and sex. See [Supplementary Table 1](#) for the list of abbreviations.
